# Supplementary material for: Multicomponent synthesis of pyridines via diamine functionalized mesoporous ZrO2 domino intramolecular tandem Michael type addition
Source: Royal Society of Chemistry journal article supplement (doi:10.1039/c4ra13552k), 2014-12-03
Supplement: c4ra13552k1.pdf [file c4ra13552k1.pdf]

**Multicomponent synthesis of Pyridines *via* diamine functionalized  
mesoporous ZrO<sub>2</sub> domino Intramolecular tandem Michael type addition**

Ramakanth Pagadala, Devendar Reddy Kommidi, Surjyakanta Rana, Suresh Maddila, Brenda  
Moodley, N. A. Koorbanally, Sreekantha B. Jonnalagadda,\*

School of Chemistry & Physics, University of KwaZulu-Natal, Westville Campus, Chiltern  
Hills, Durban-4000, South Africa

Corresponding author: Tel.: +27 31 260 7325/3090; fax: +27 31 260 3091

E-mail: [jonnalagaddas@ukzn.ac.za](mailto:jonnalagaddas@ukzn.ac.za)

**Materials and methods**

***Apparatus and analysis***

All chemicals used were reagent grade and were used as received without further purification. <sup>1</sup>H NMR and <sup>13</sup>C NMR spectra were recorded at 25 °C at 400 MHz and 100 MHz (Bruker Avance) respectively, using TMS as internal standard. Chemical shifts are given in parts per million (ppm). FT-IR spectroscopy was performed on a Perkin-Elmer Precisely 100 FT-IR spectrometer in the 400-40000 cm<sup>-1</sup> region. ESI-MS spectra were determined on a LCQ ion trap mass spectrometer (Thermo Fisher, San Jose, CA, USA), equipped with an ESI source. Melting points were recorded on a hot stage melting point apparatus Ernst Leitz Wetzlar, Germany and were uncorrected. All the reactions and the purity of products were monitored using thin layer chromatography (TLC) on aluminum-backed plates coated with Merck Kieselgel 60 F254 silica gel, visualizing the spots under ultraviolet light and iodine chamber.

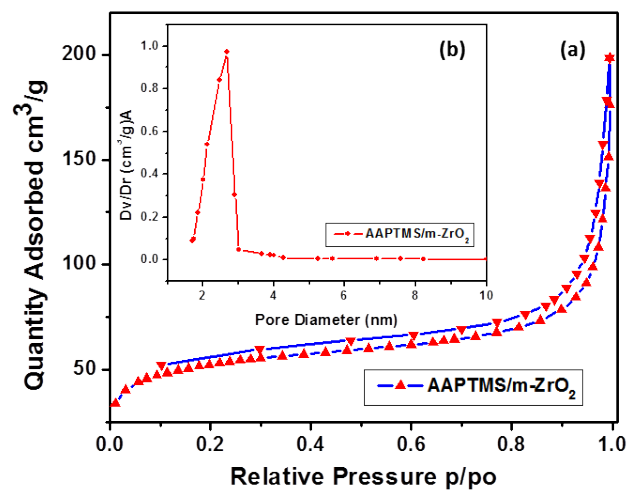

**Figure S1** (a)  $N_2$ -adsorption-desorption isotherm of AAPTMS/m-ZrO<sub>2</sub> and (b) pore size distribution of AAPTMS/m-ZrO<sub>2</sub>

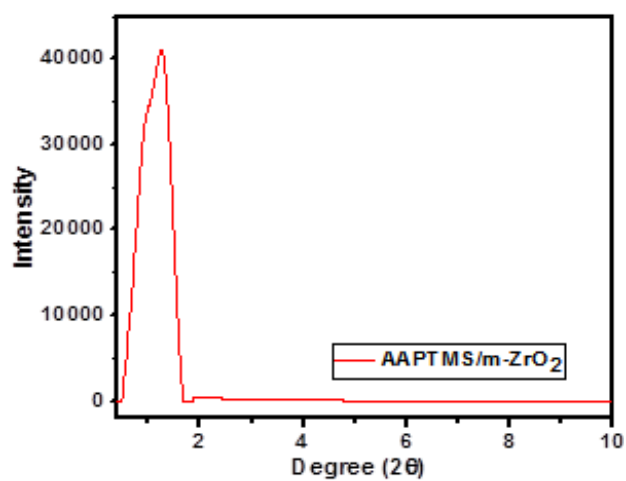

**Figure S2.** Small angle XRD spectra of DF/m-ZrO<sub>2</sub>

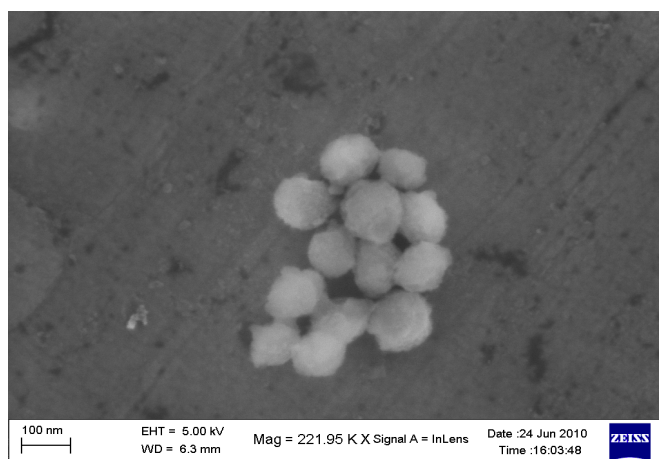

**Figure S3.** Scanning electron micrograph of AAPTMS/m-ZrO<sub>2</sub> sample

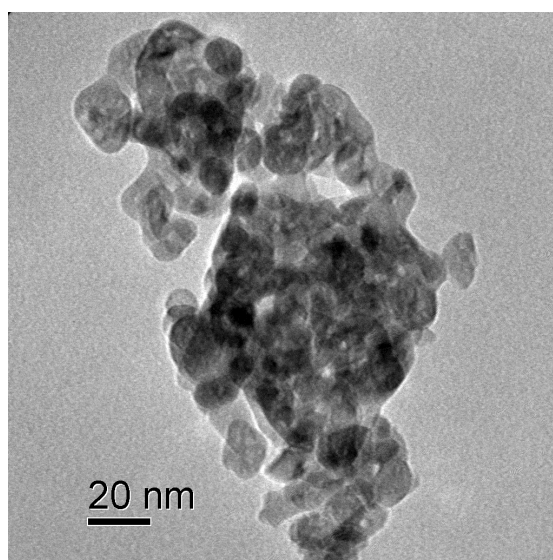

**Figure S4.** TEM image of AAPTMS/m-ZrO<sub>2</sub> sample

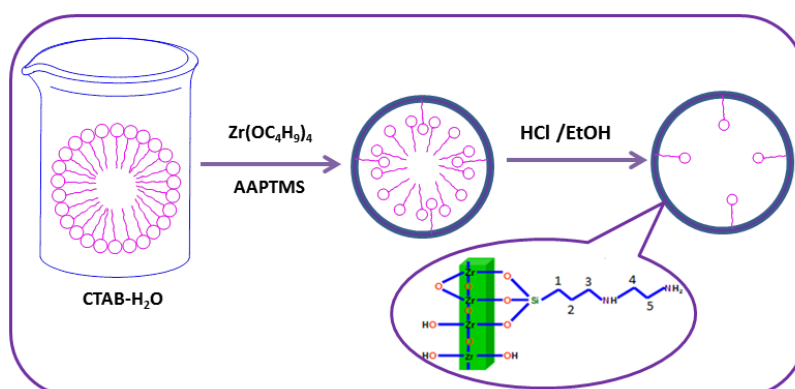

**Figure S5.** The schematic diagram for the synthesis of AAPTMS/m-ZrO<sub>2</sub> catalyst

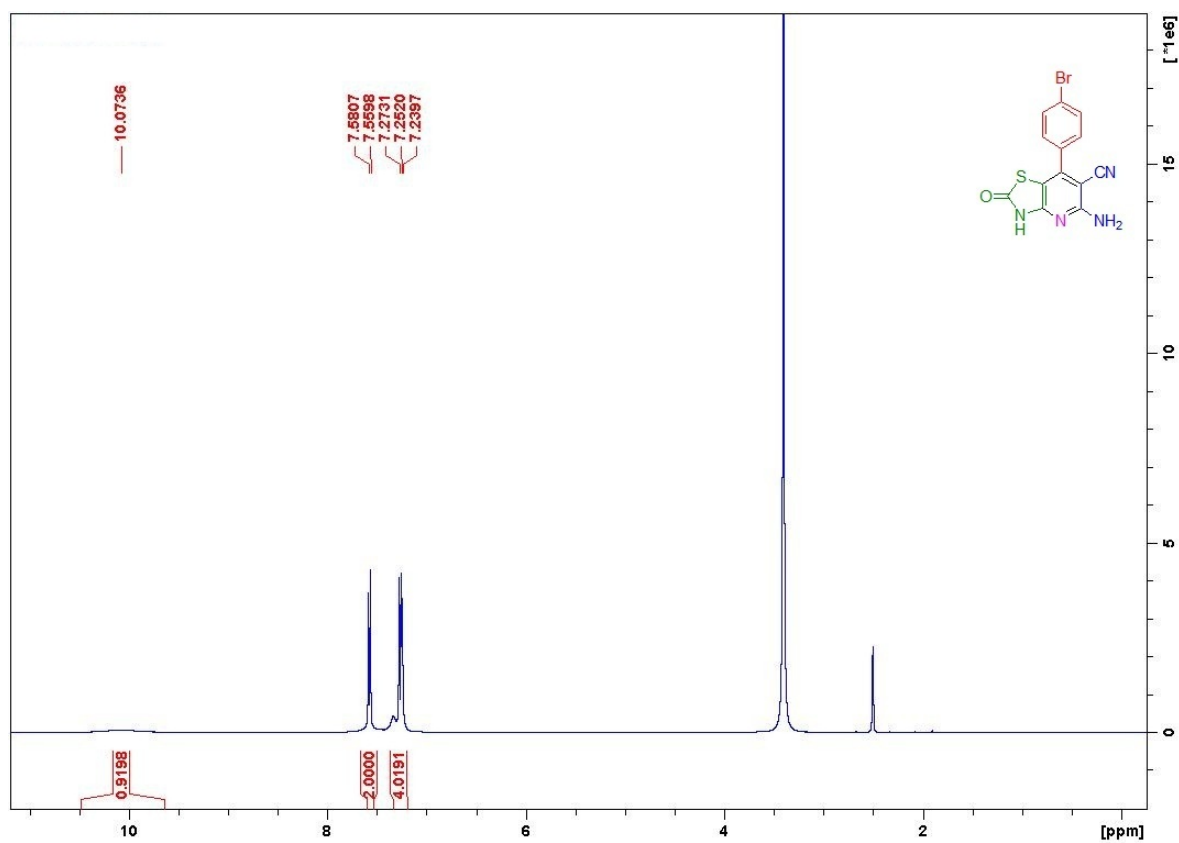

$^1\text{H}$  NMR spectra of compound **5a**

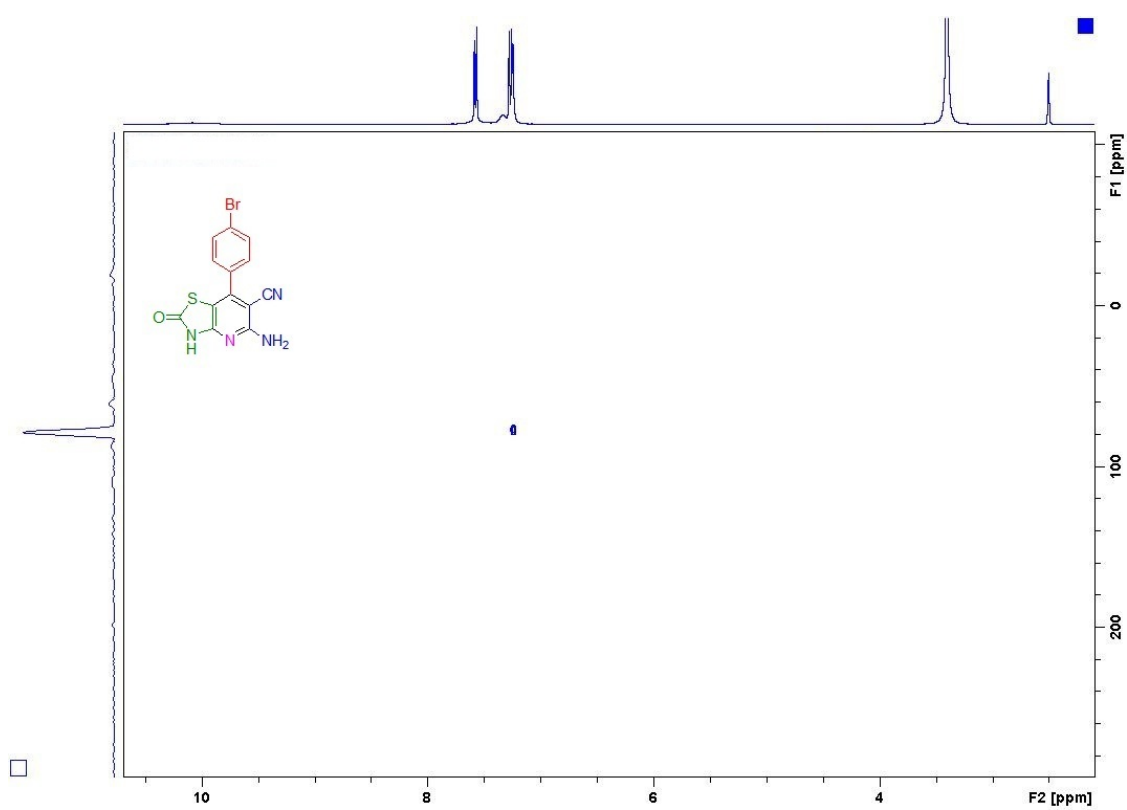

$^{15}\text{N}$  NMR (ghsqc) spectra of compound **5a**

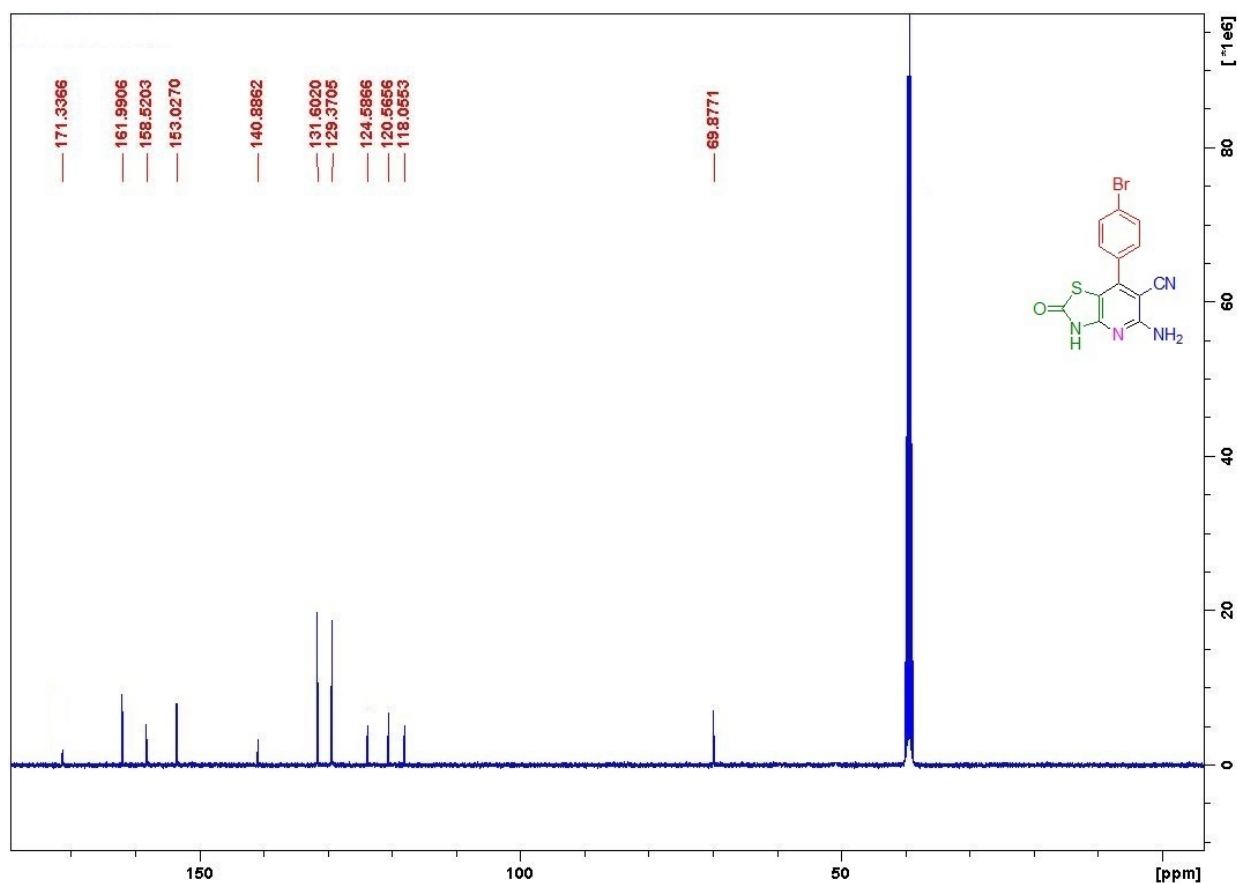

<sup>13</sup>C NMR spectra of compound **5a**

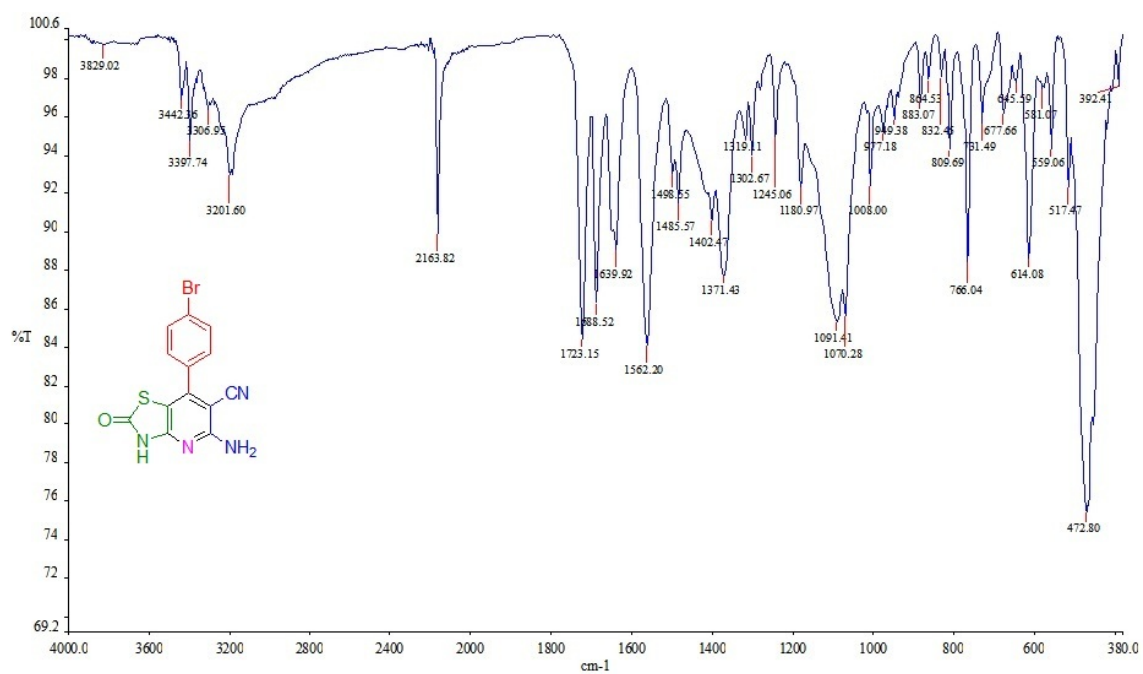

FTIR spectra of compound **5a**

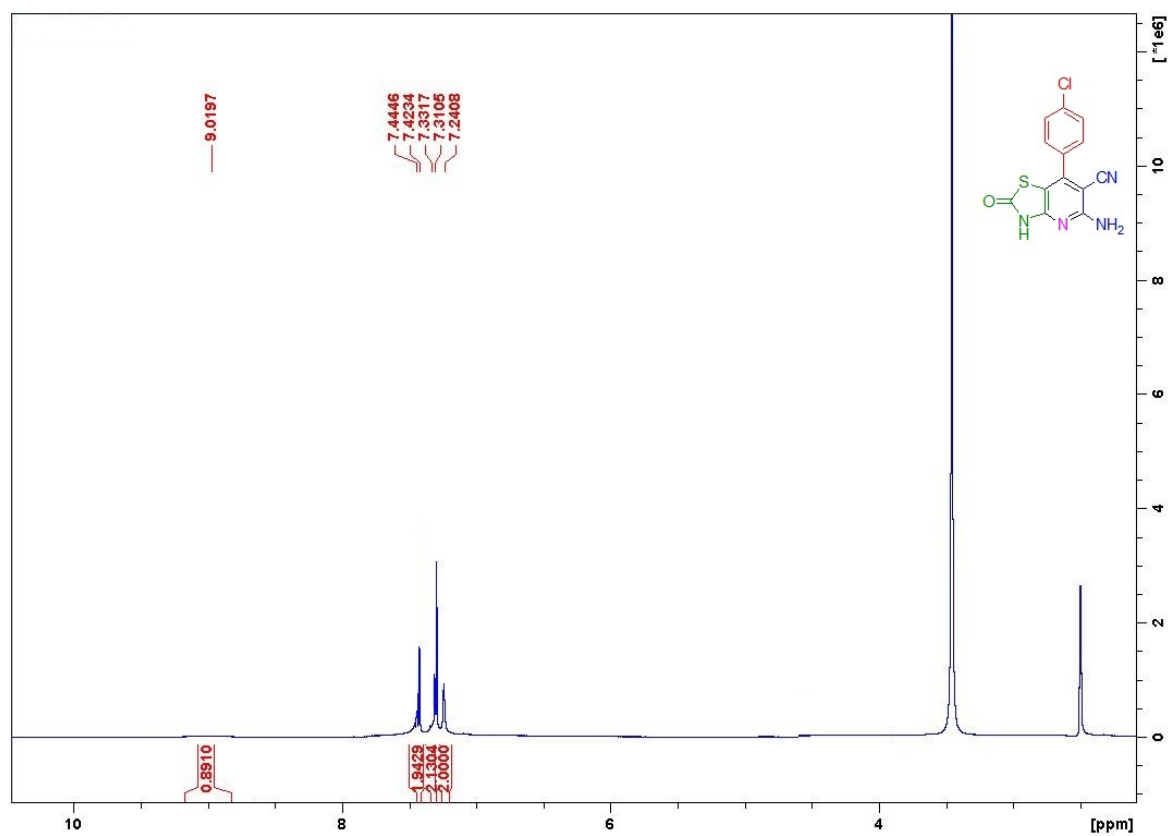

$^1\text{H}$  NMR spectra of compound **5b**

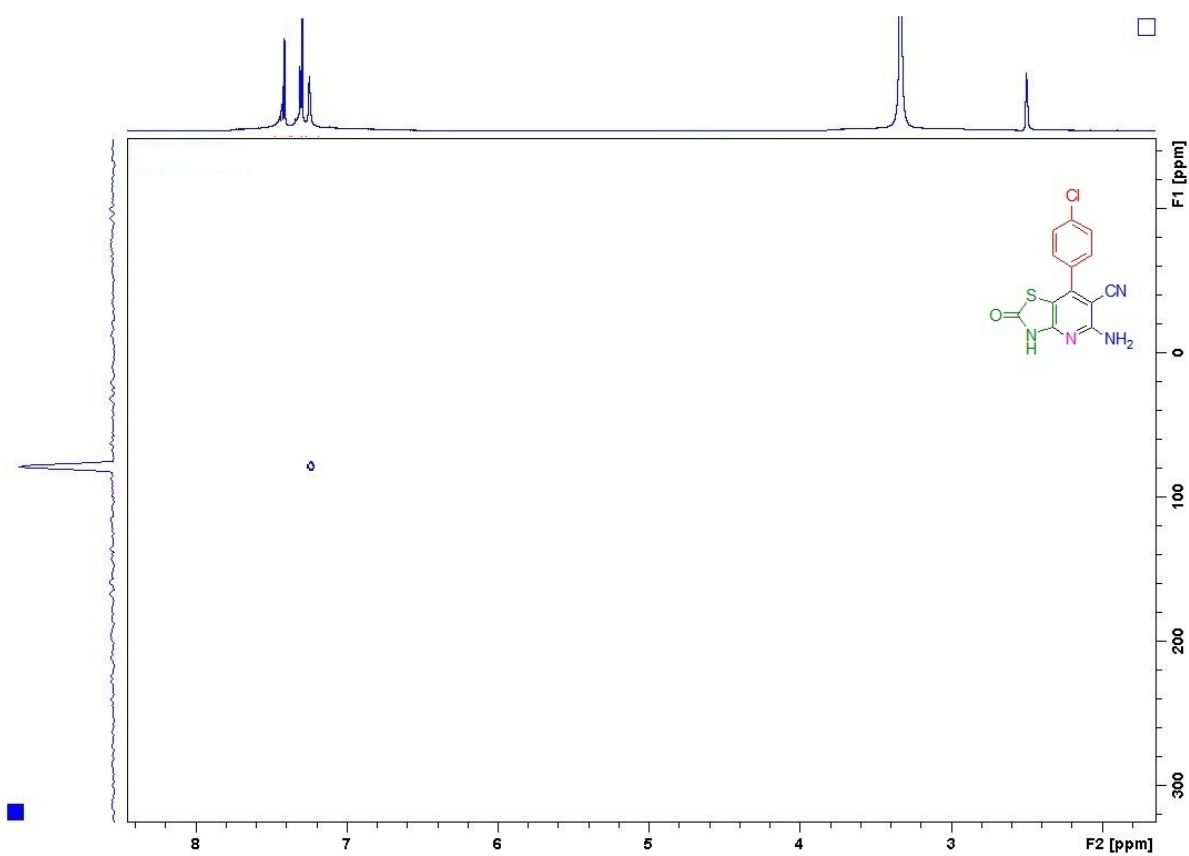

$^{15}\text{N}$  NMR (ghsqc) spectra of compound **5b**

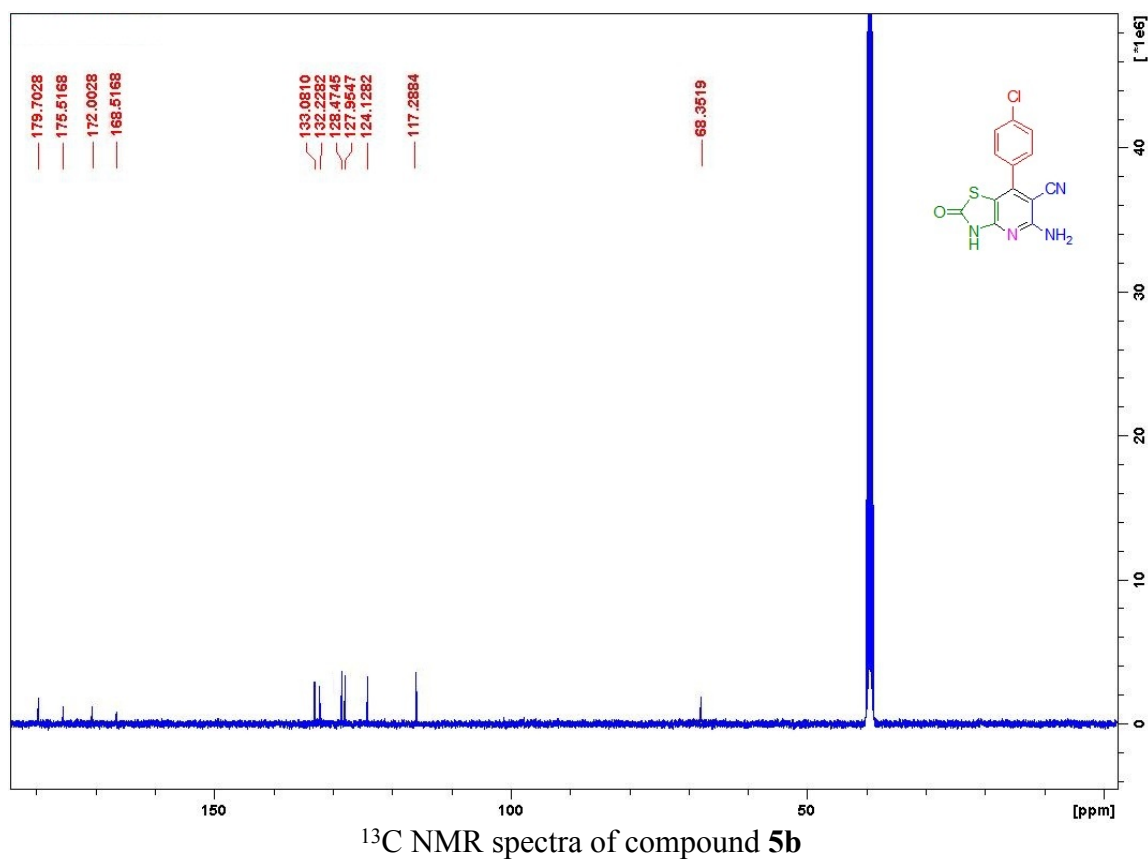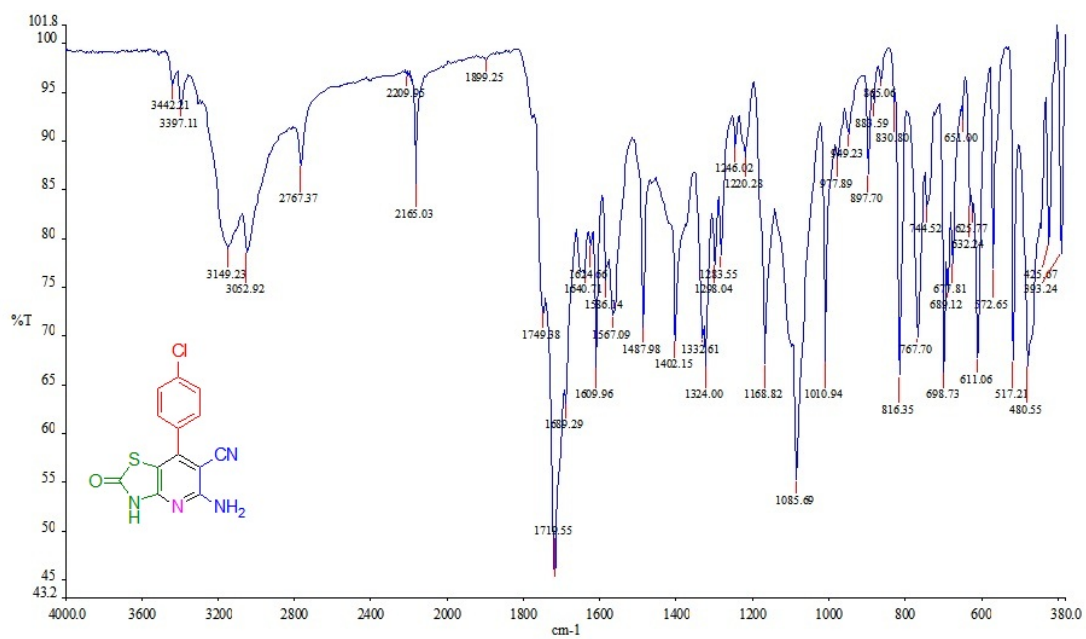

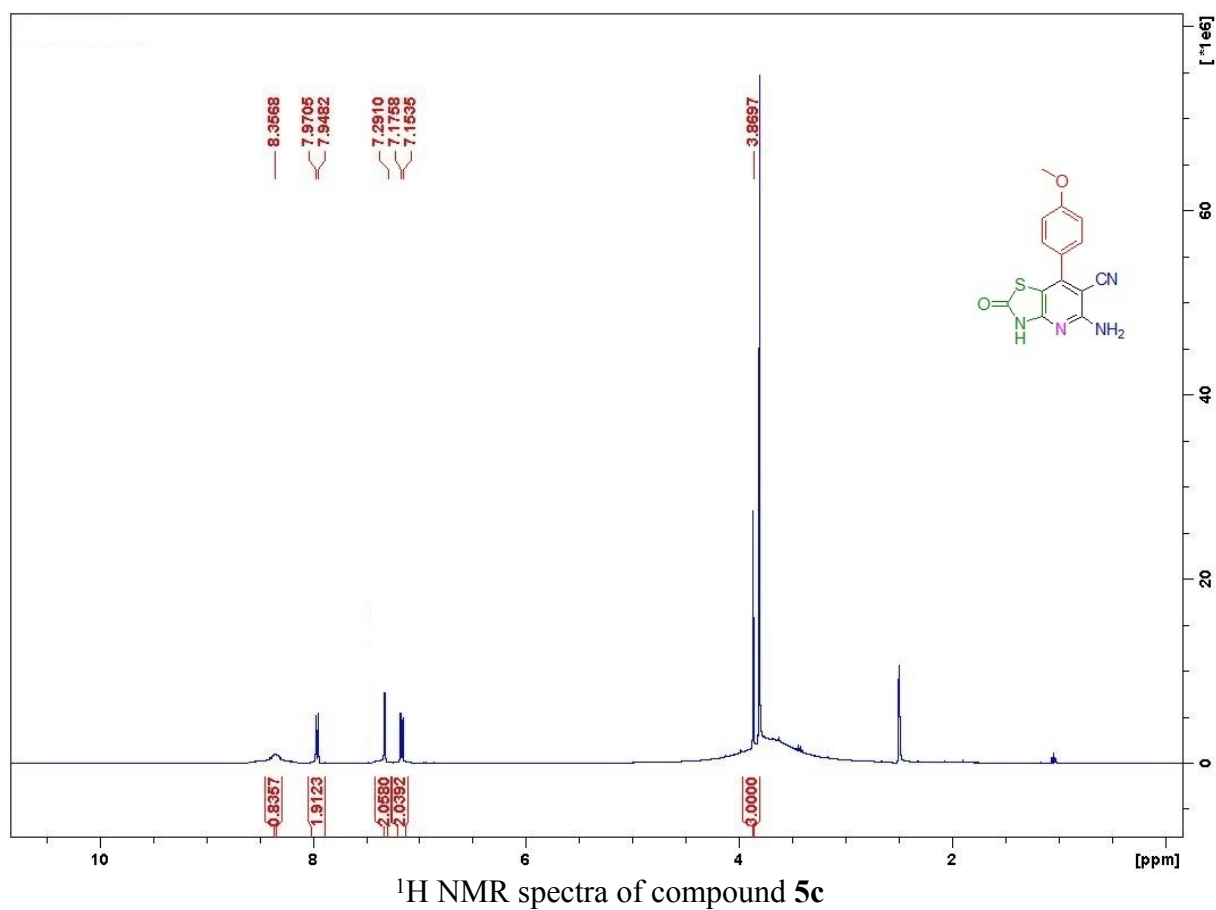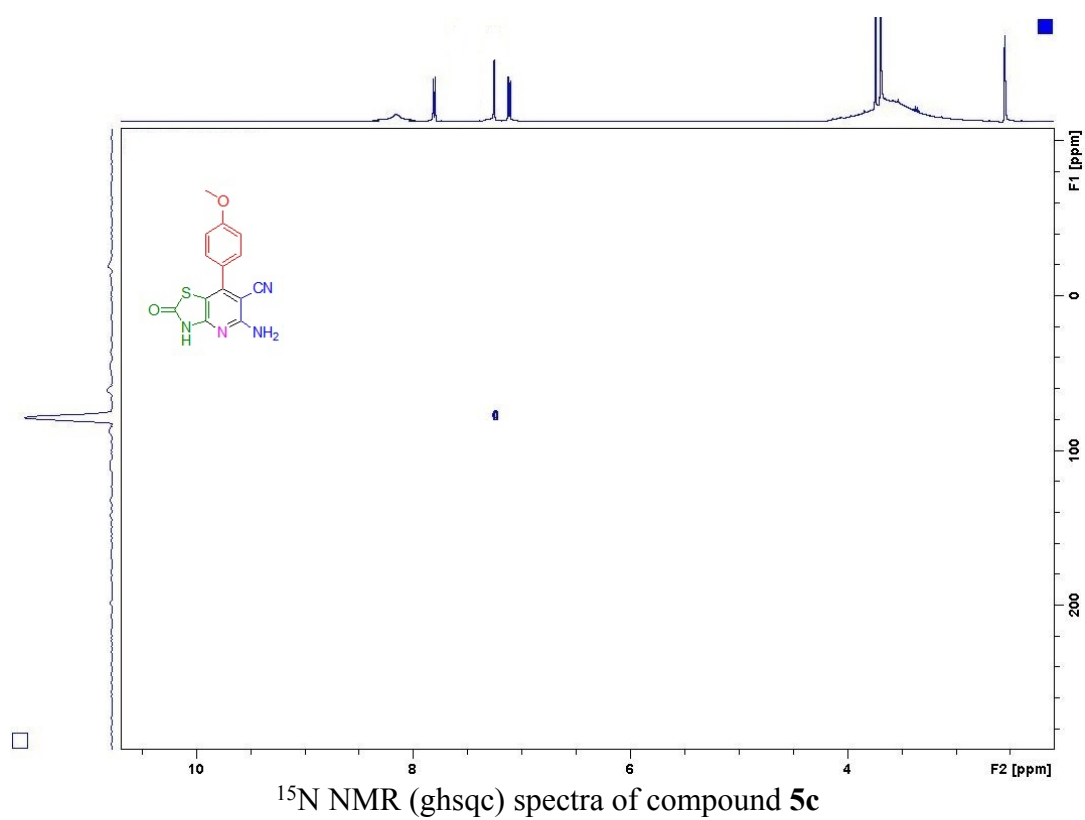

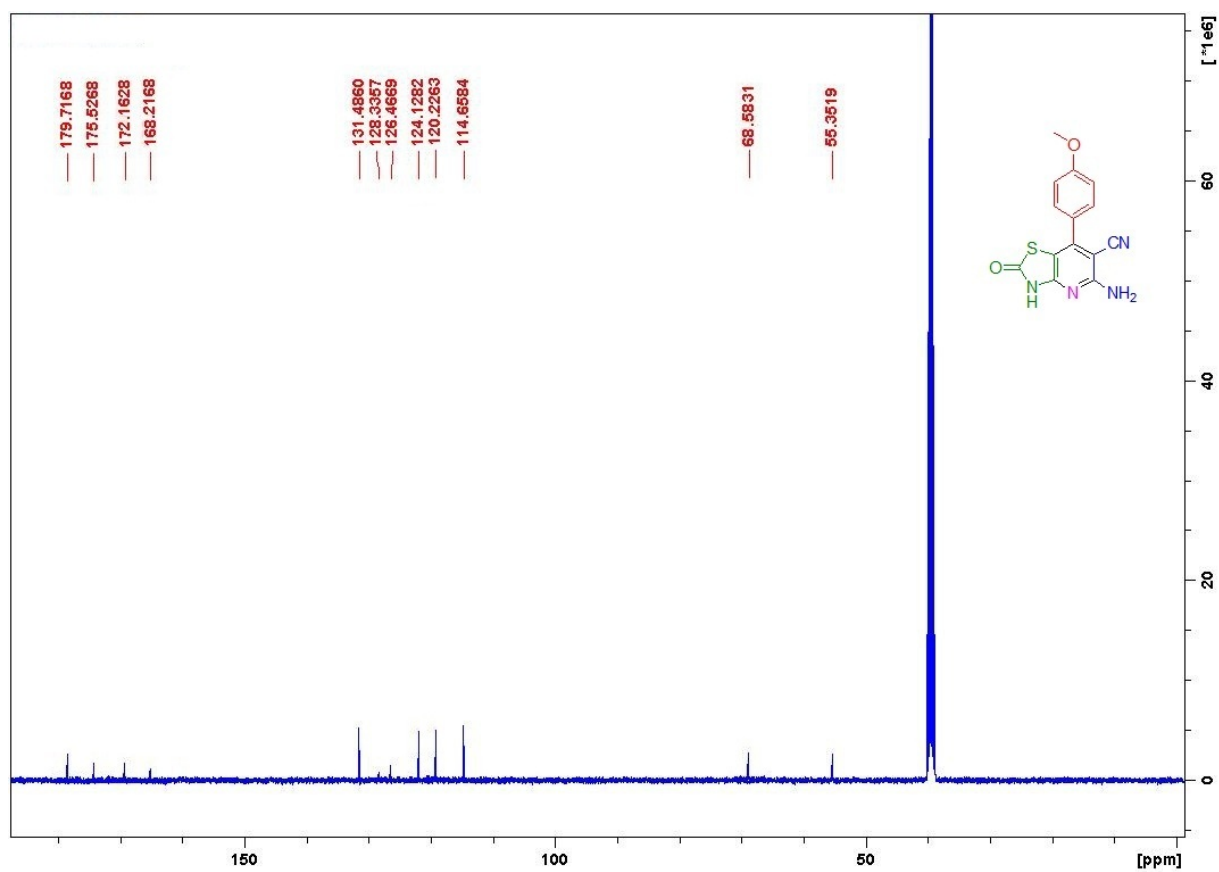

$^{13}\text{C}$  NMR spectra of compound **5c**

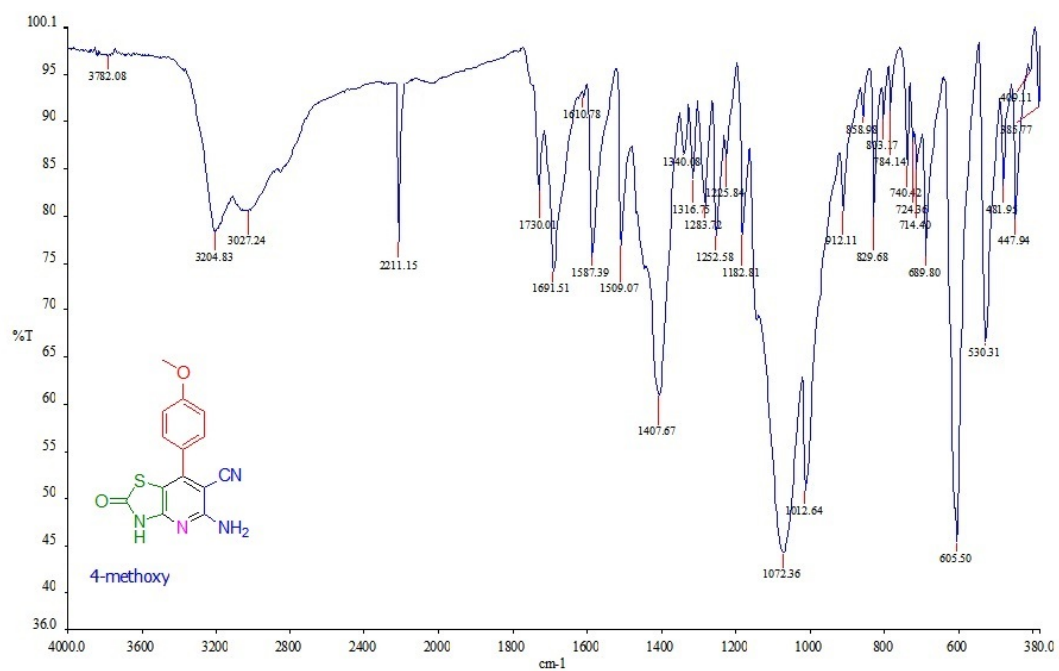

FTIR spectra of compound **5c**

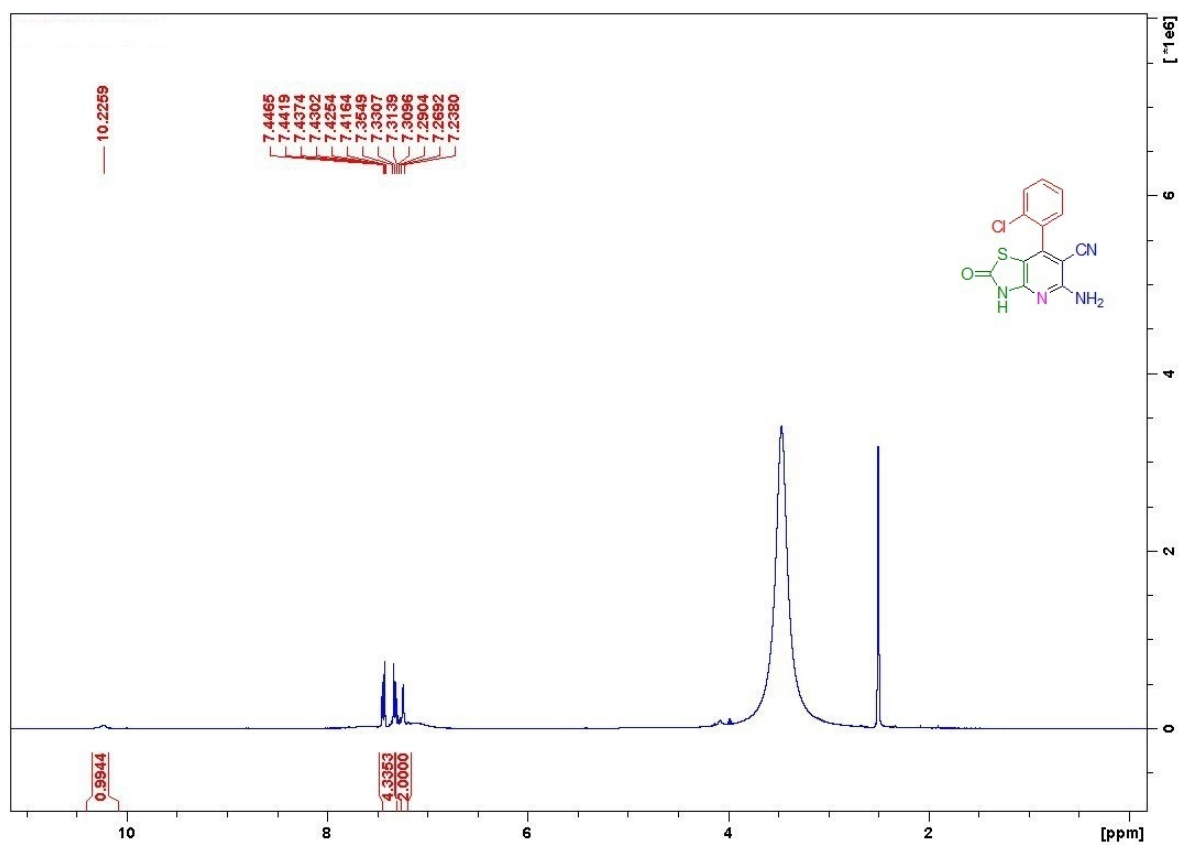

<sup>1</sup>H NMR spectra of compound **5d**

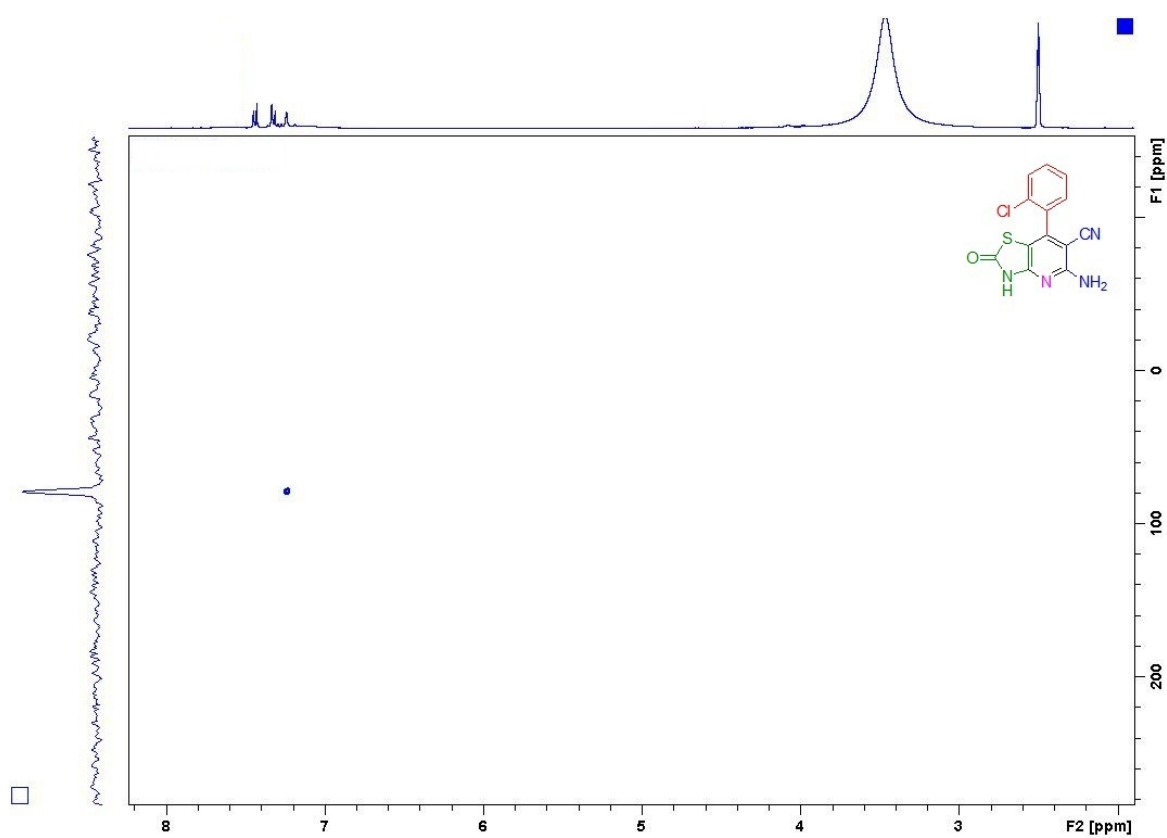

<sup>15</sup>N NMR (ghsqc) spectra of compound **5d**

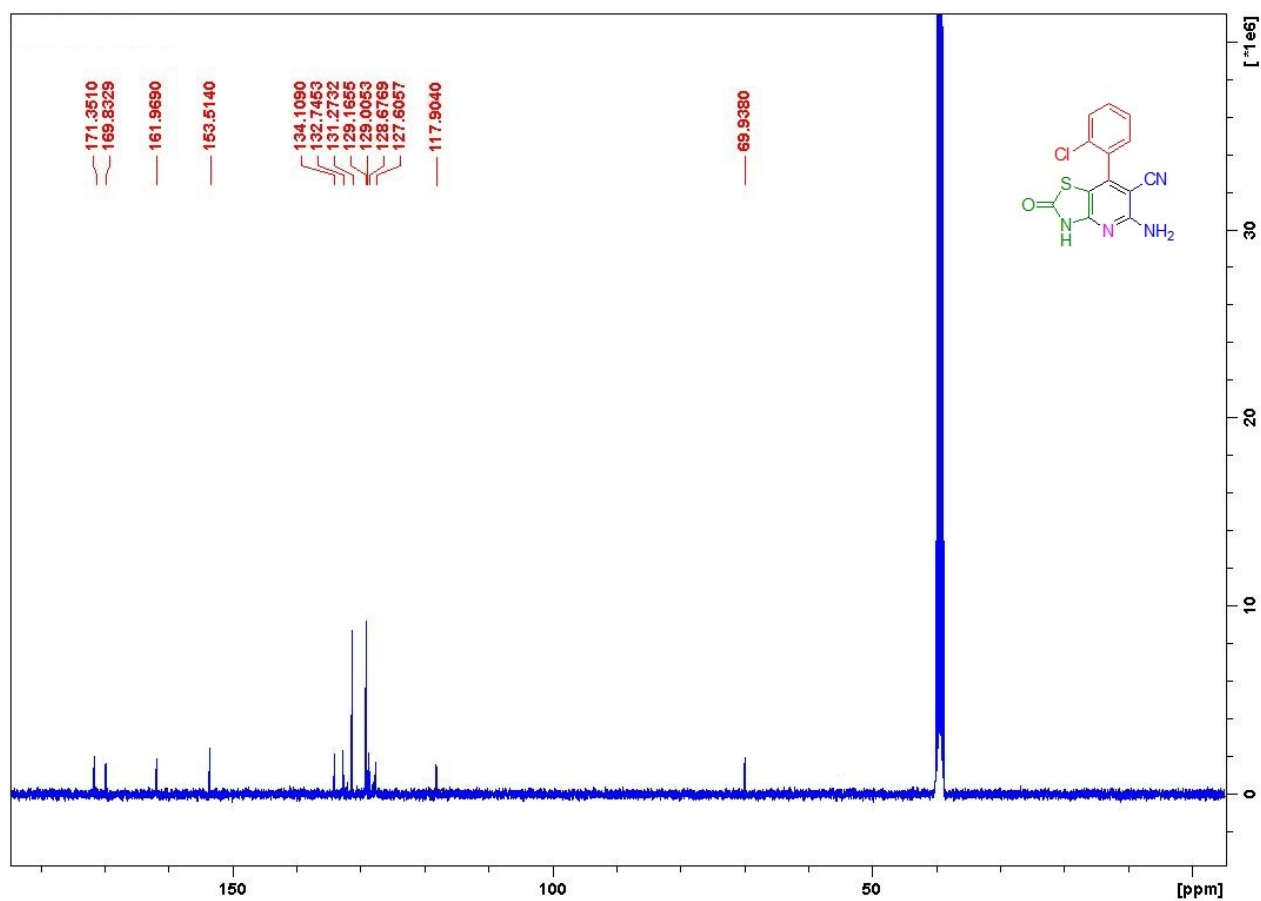

<sup>13</sup>C NMR spectra of compound **5d**

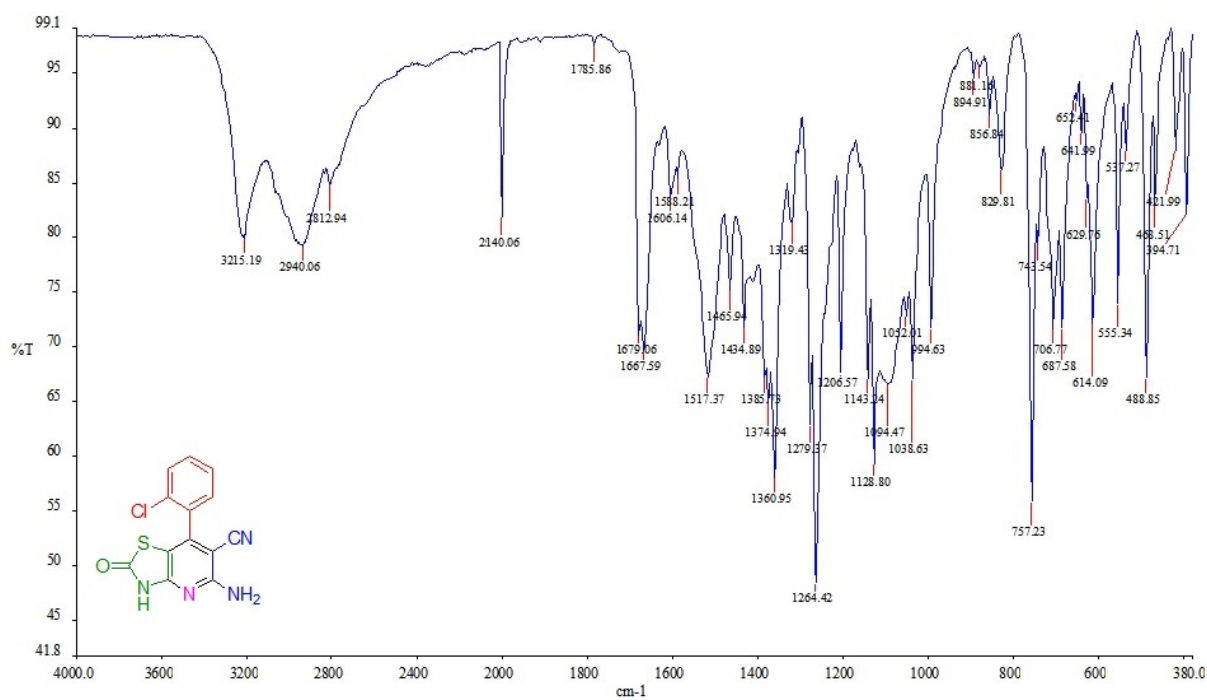

FTIR spectra of compound **5d**

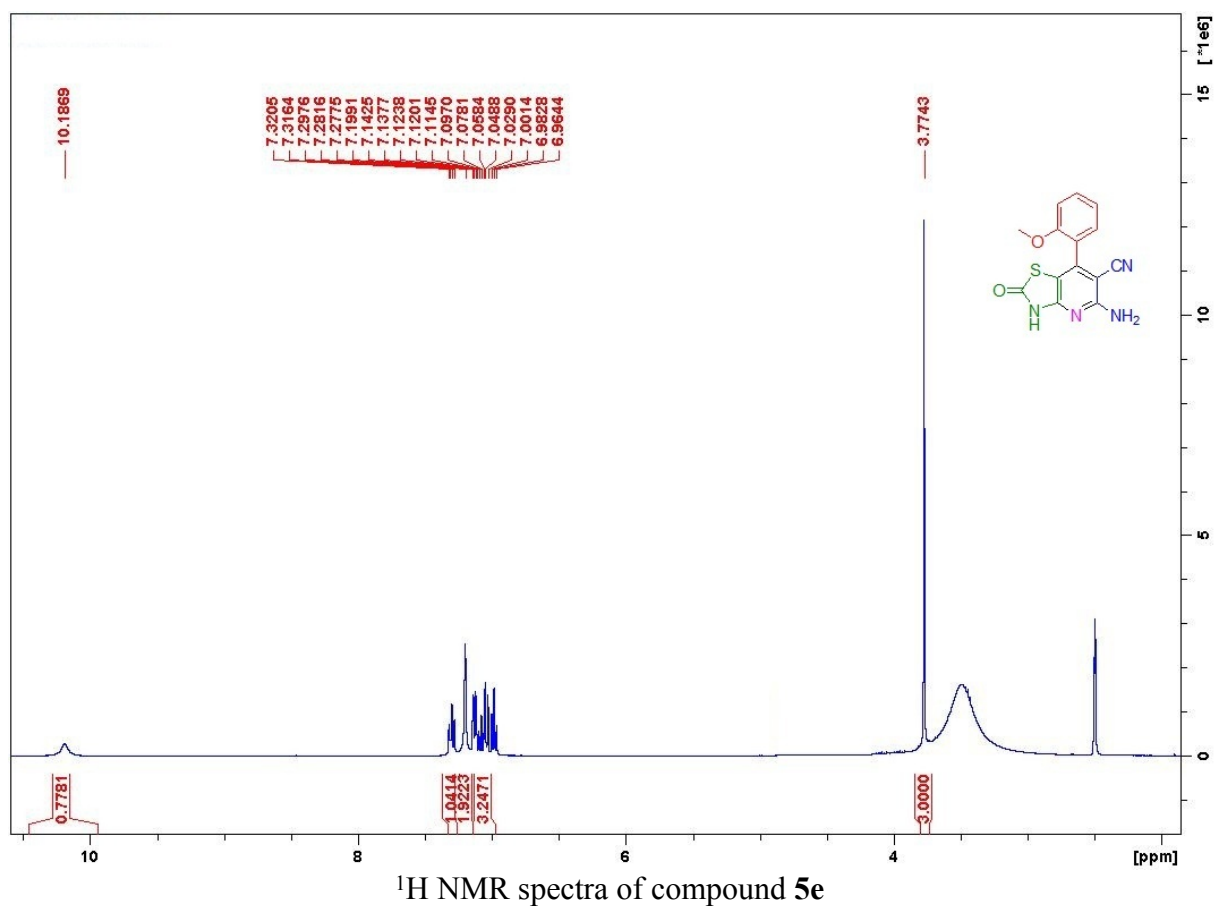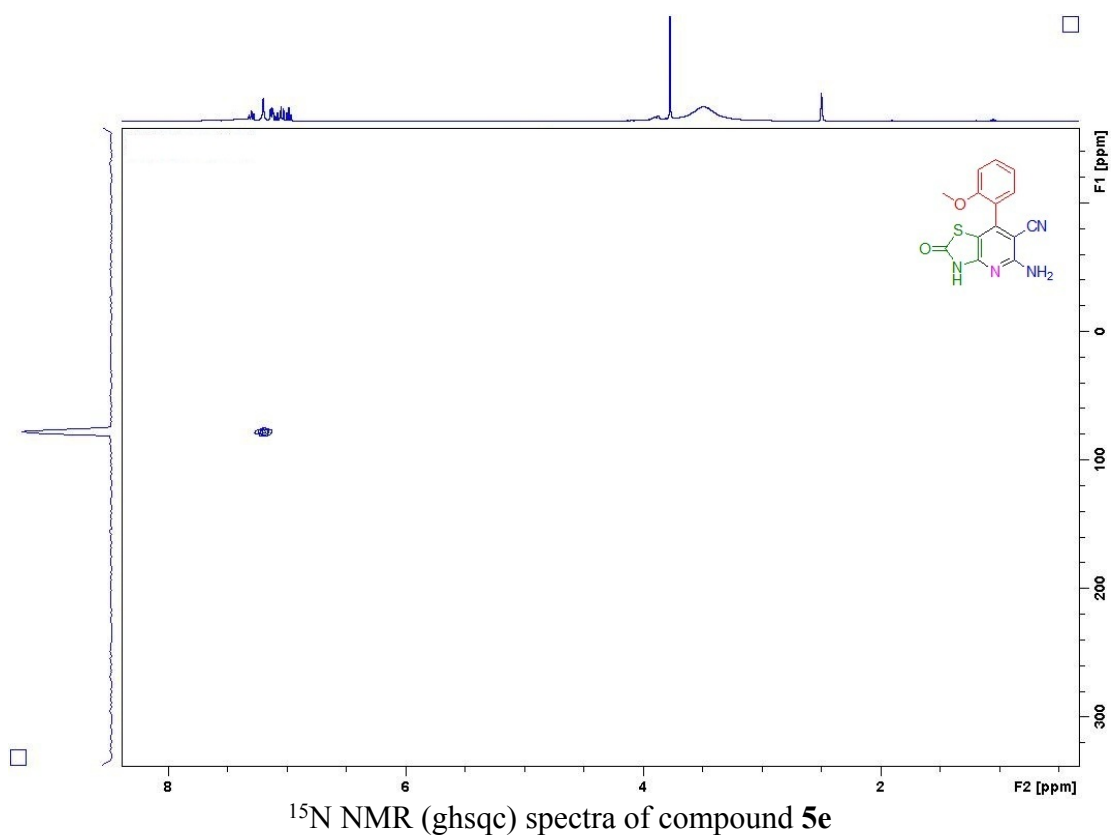

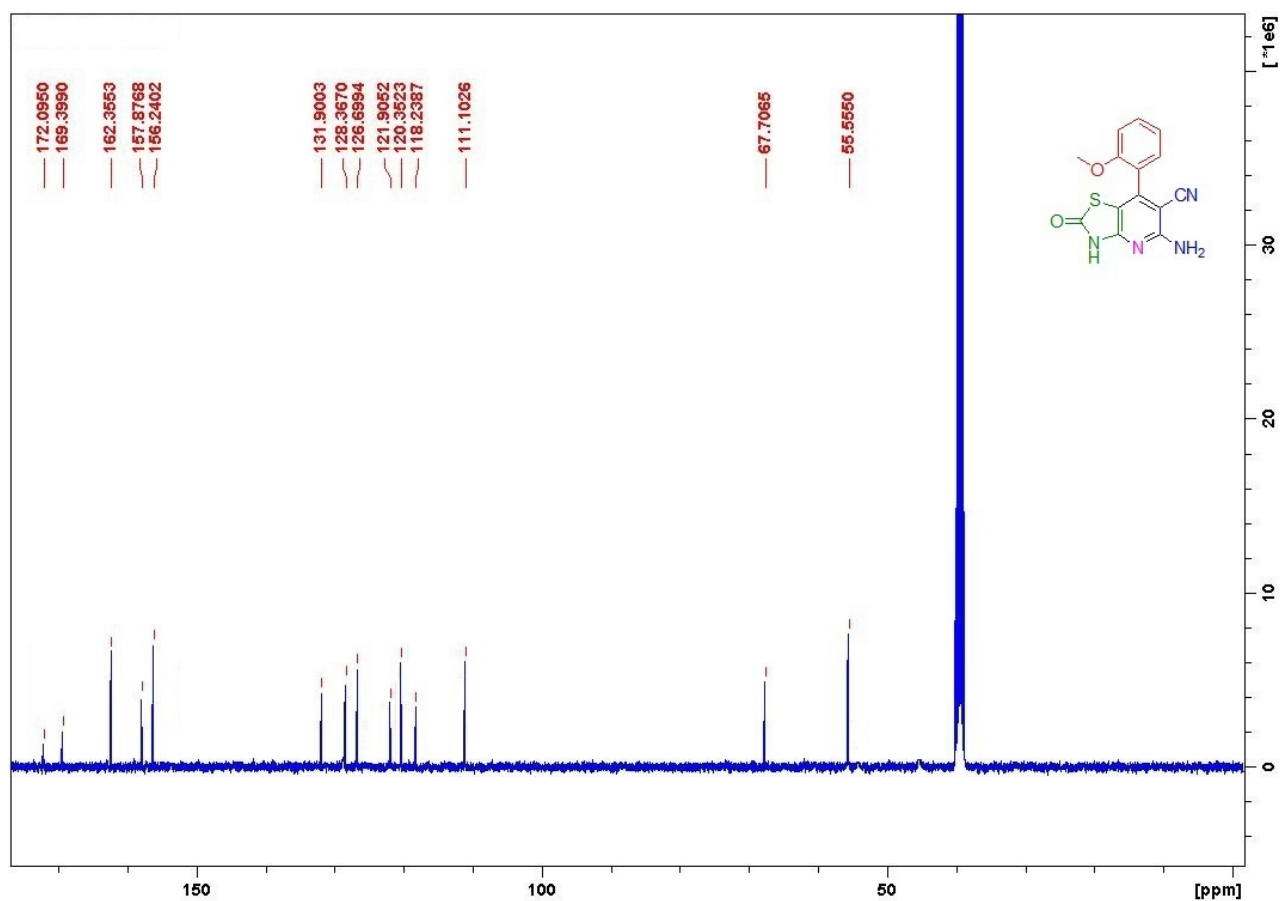

<sup>13</sup>C NMR spectra of compound 5e

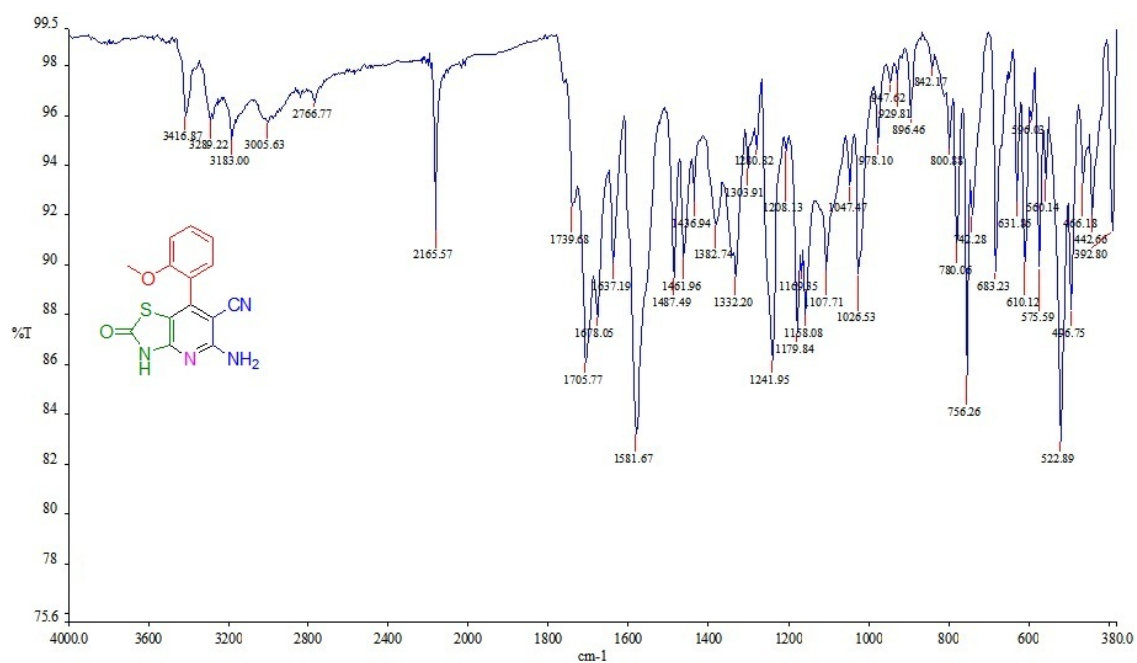

FTIR spectra of compound 5e

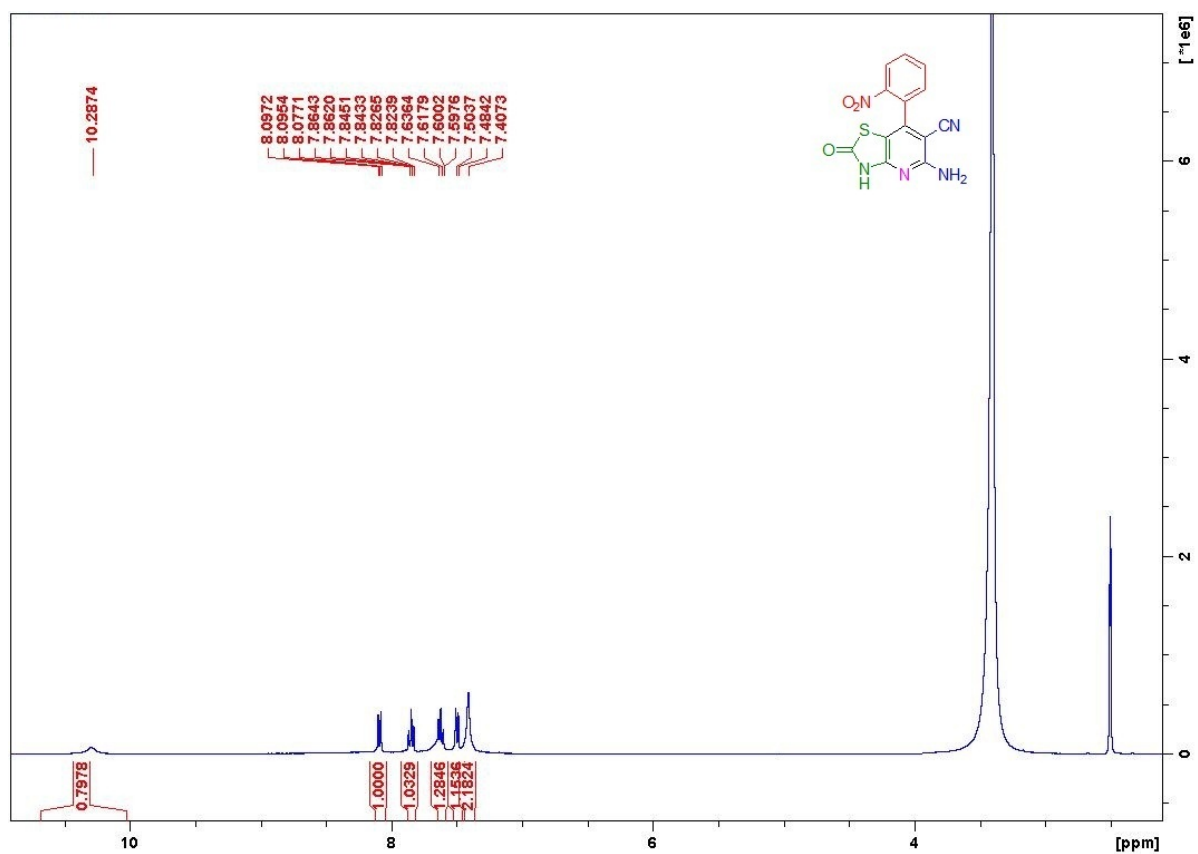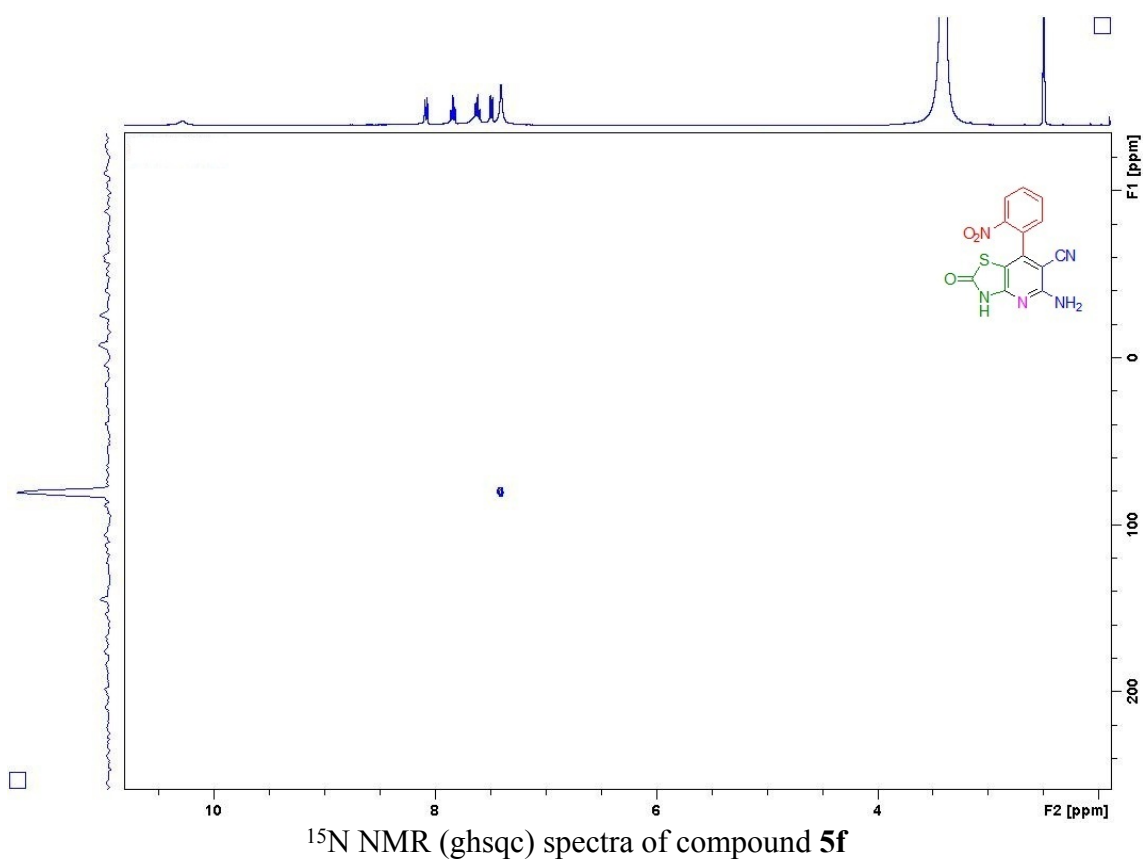

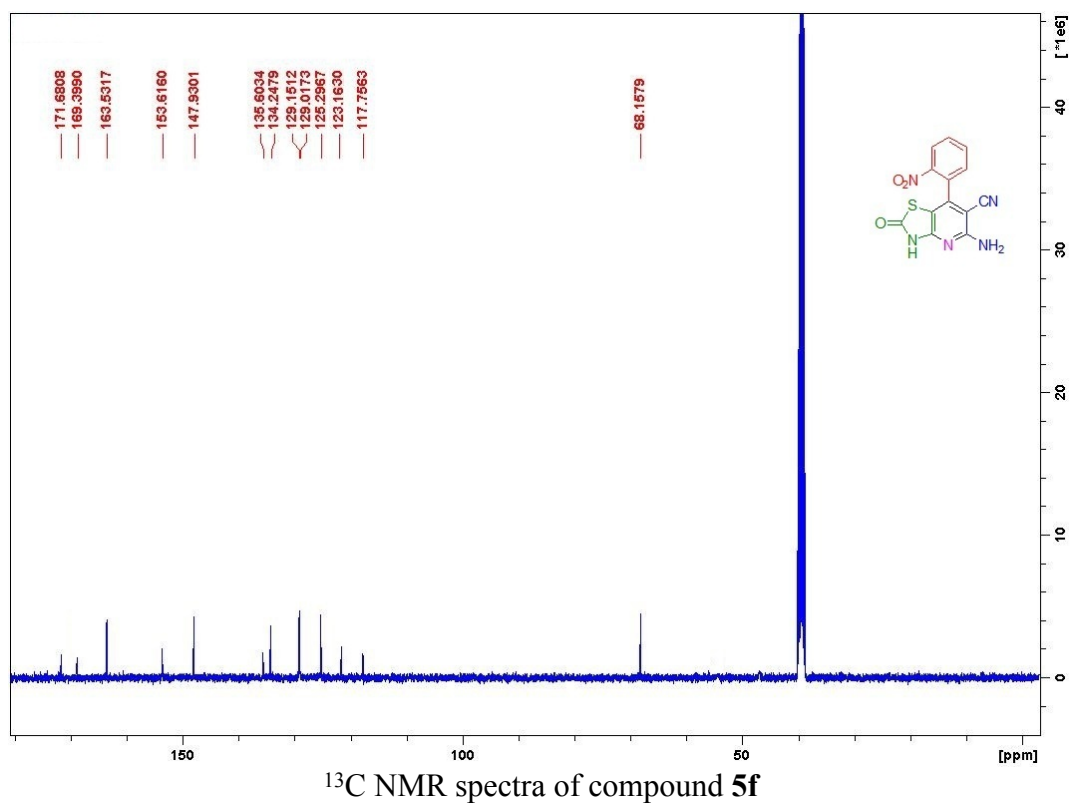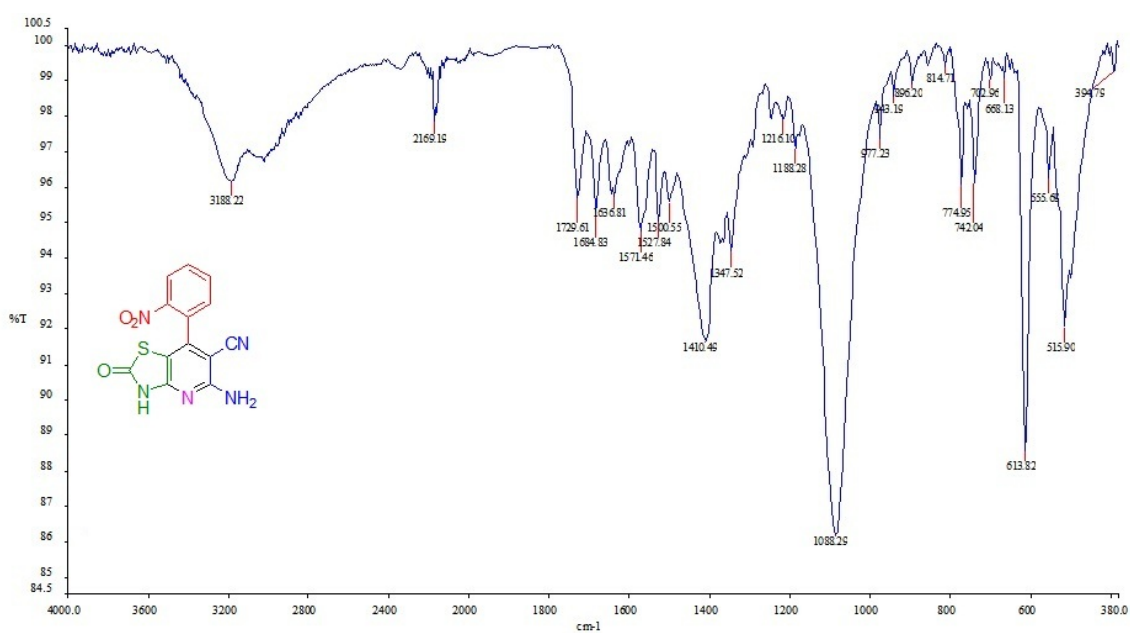

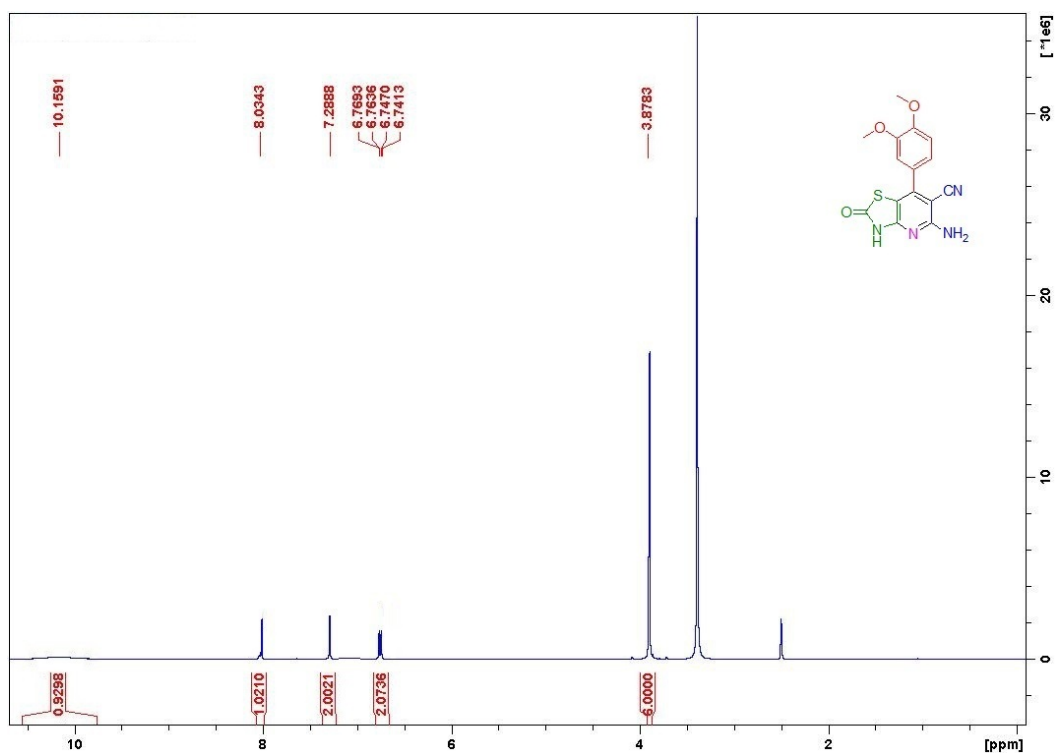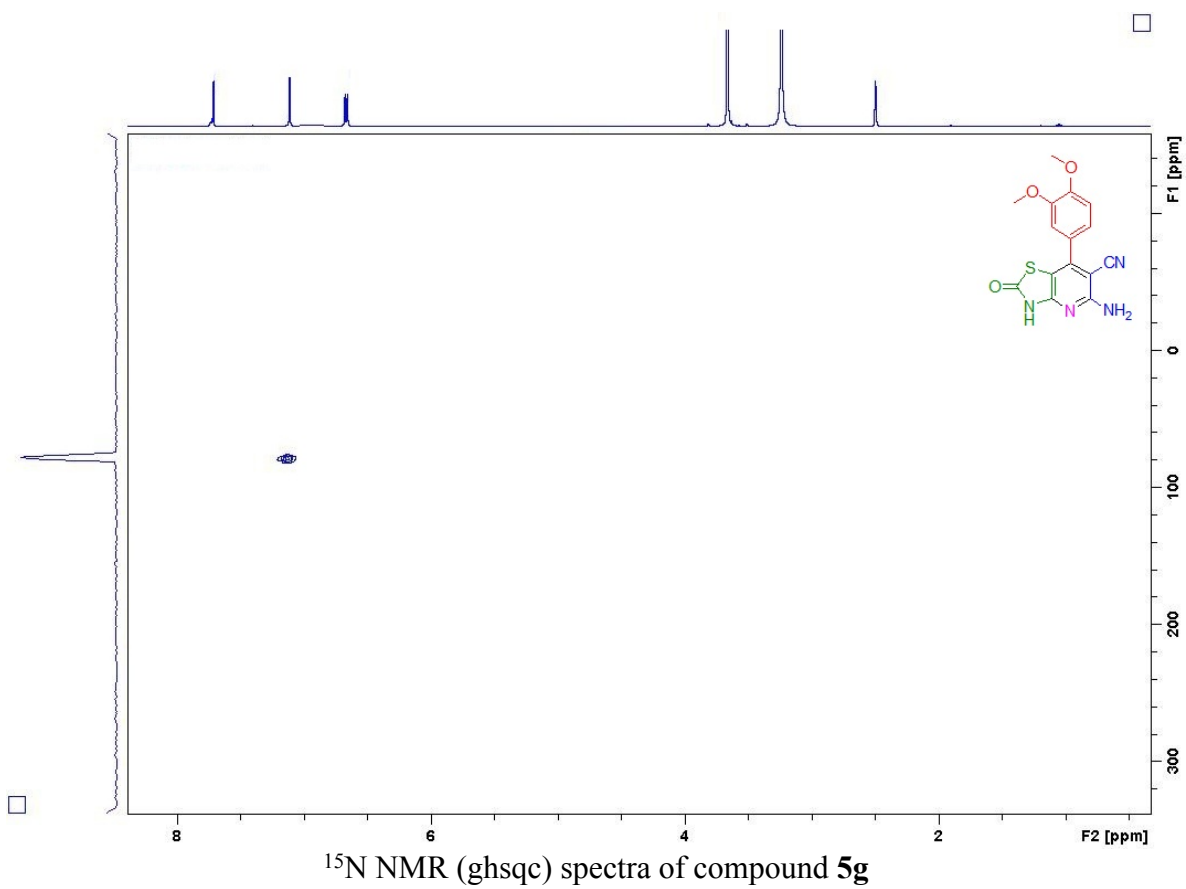

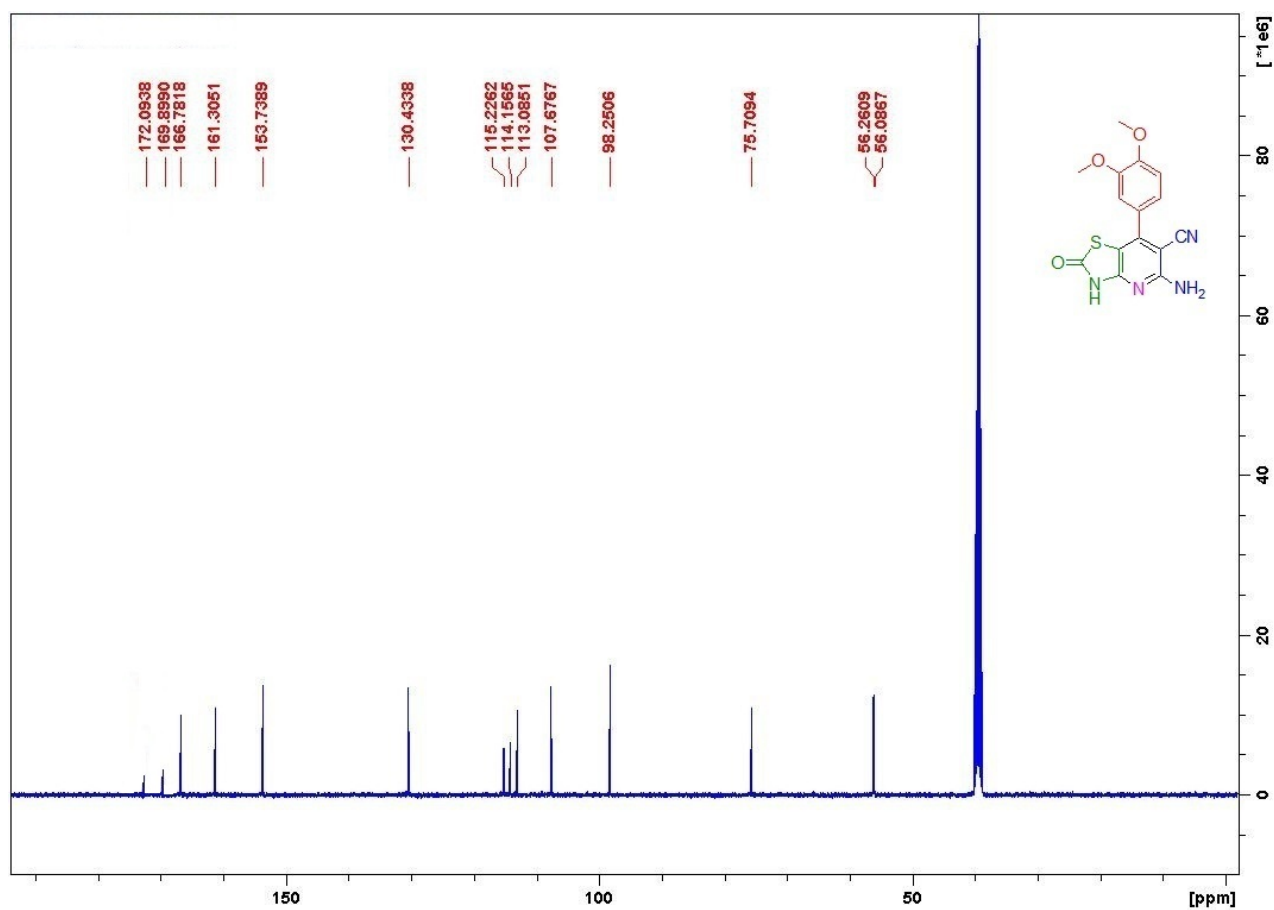

<sup>13</sup>C NMR spectra of compound **5g**

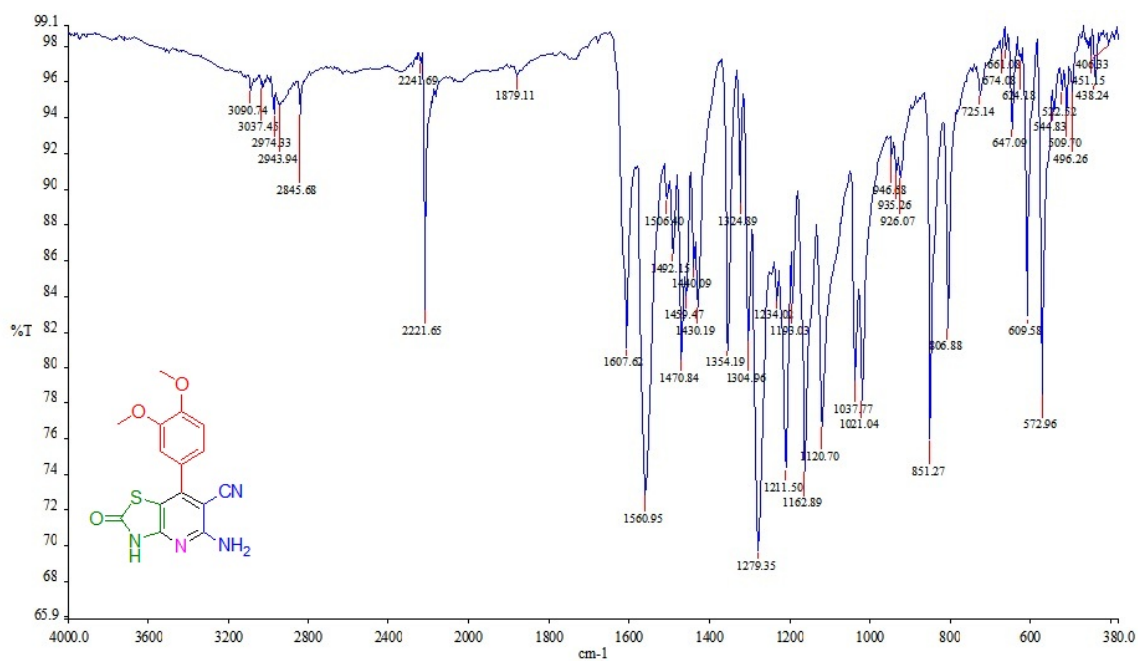

FTIR spectra of compound **5g**

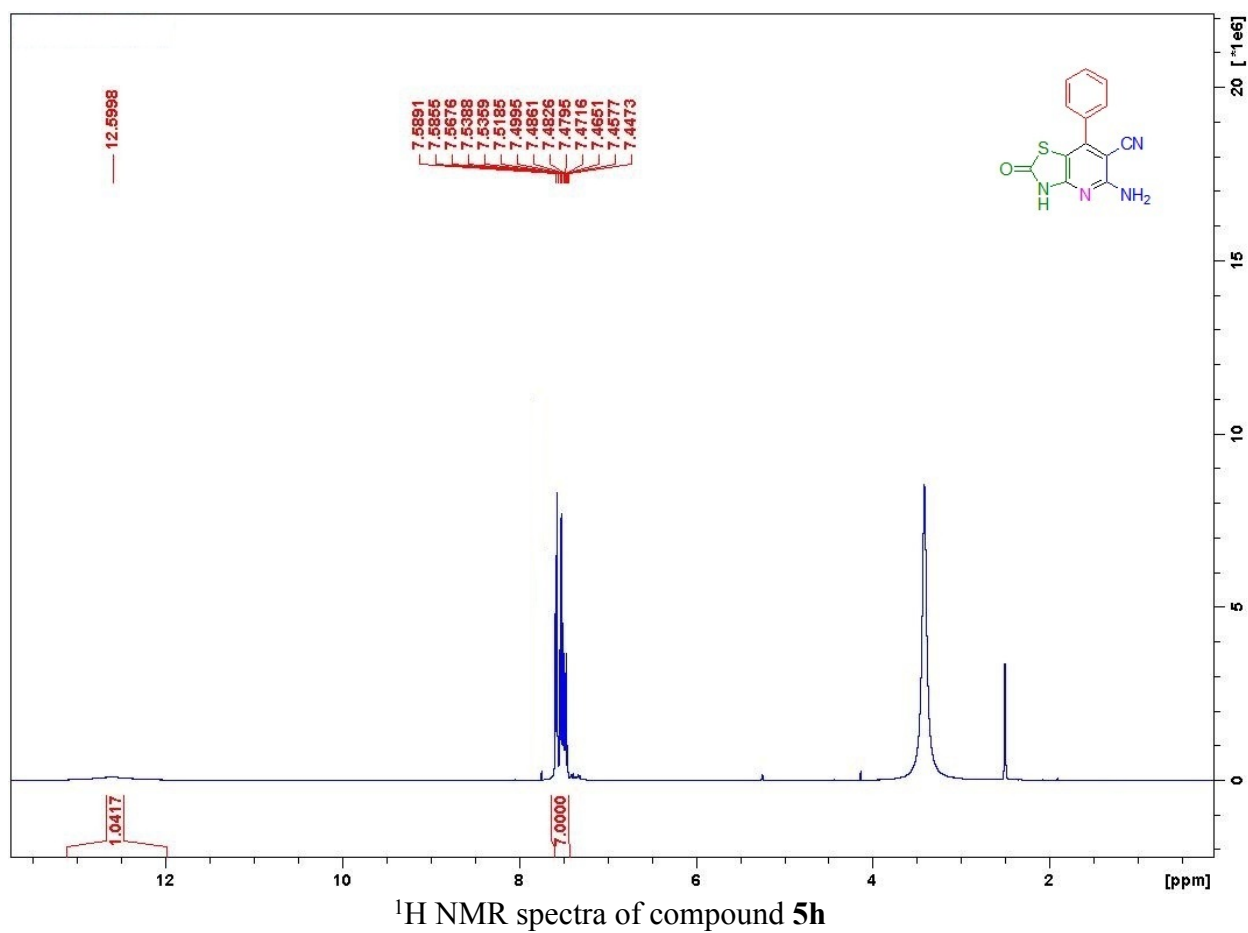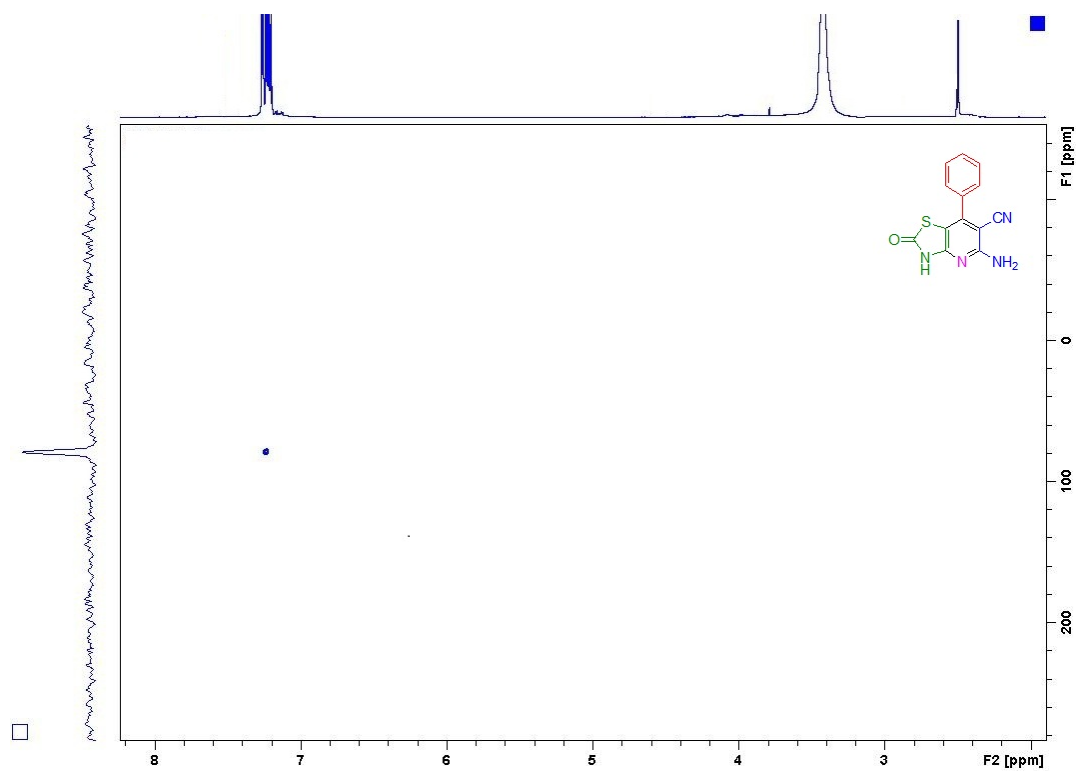

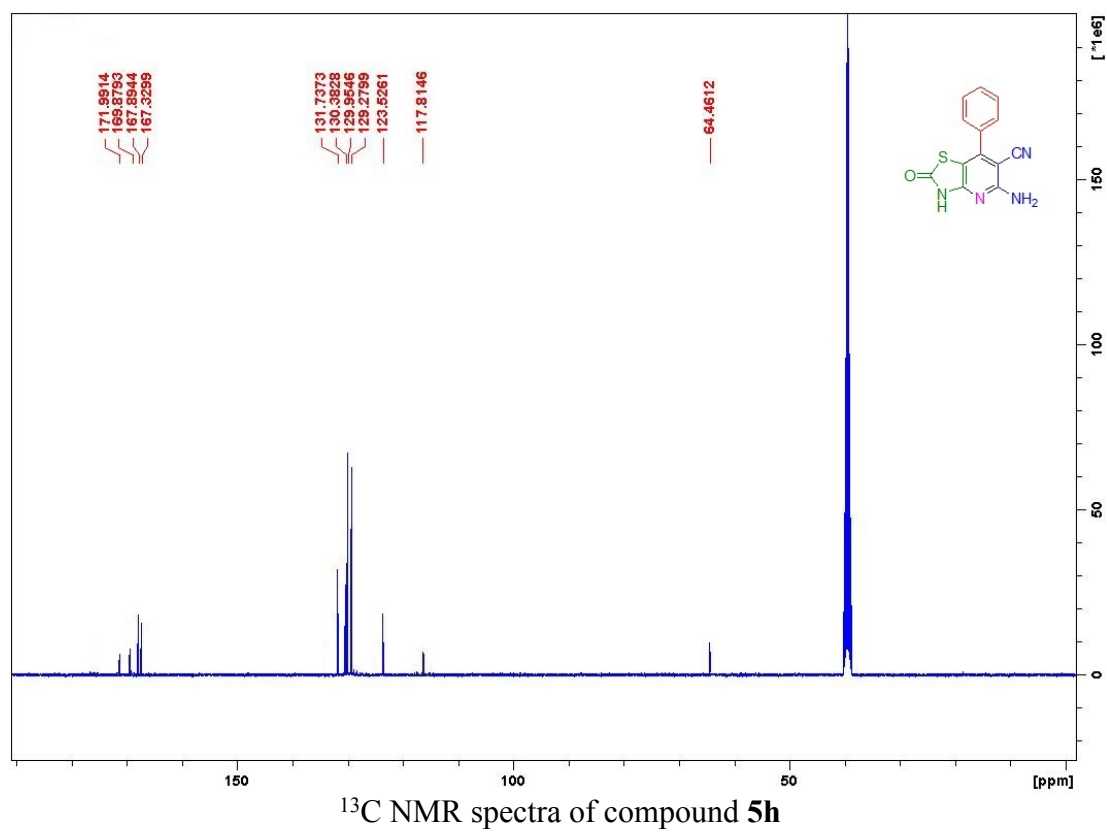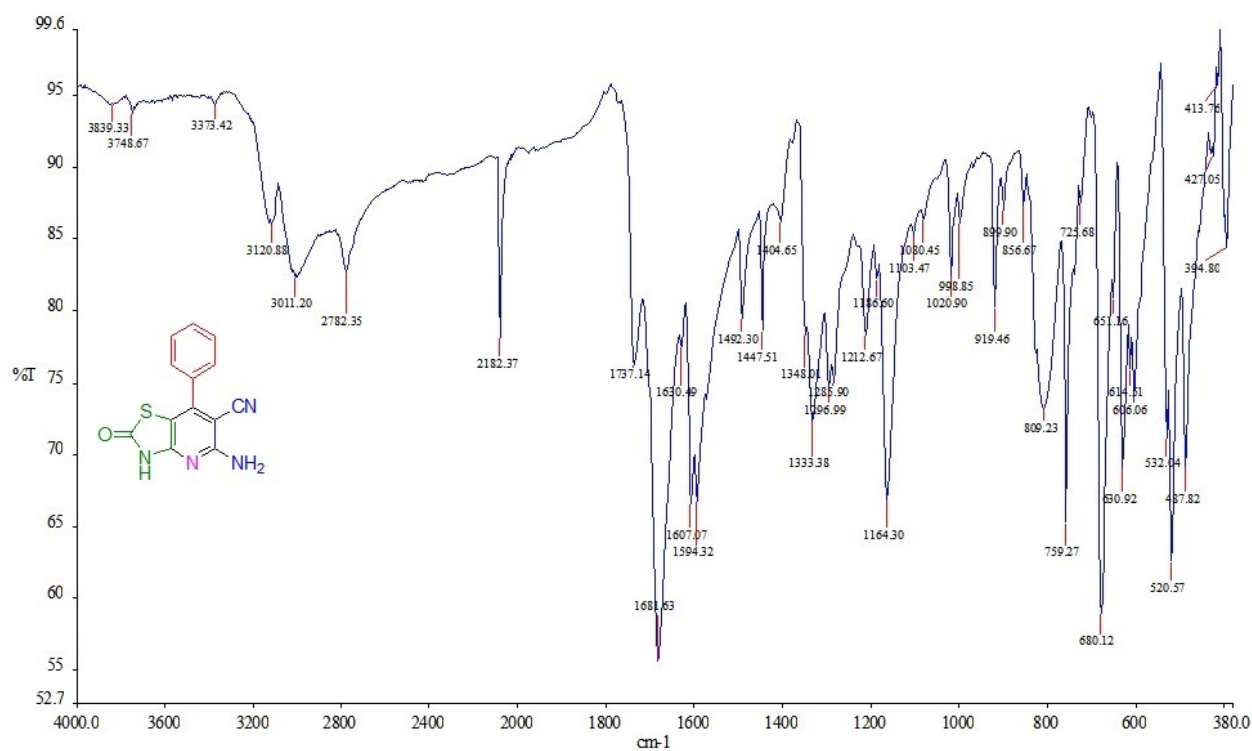

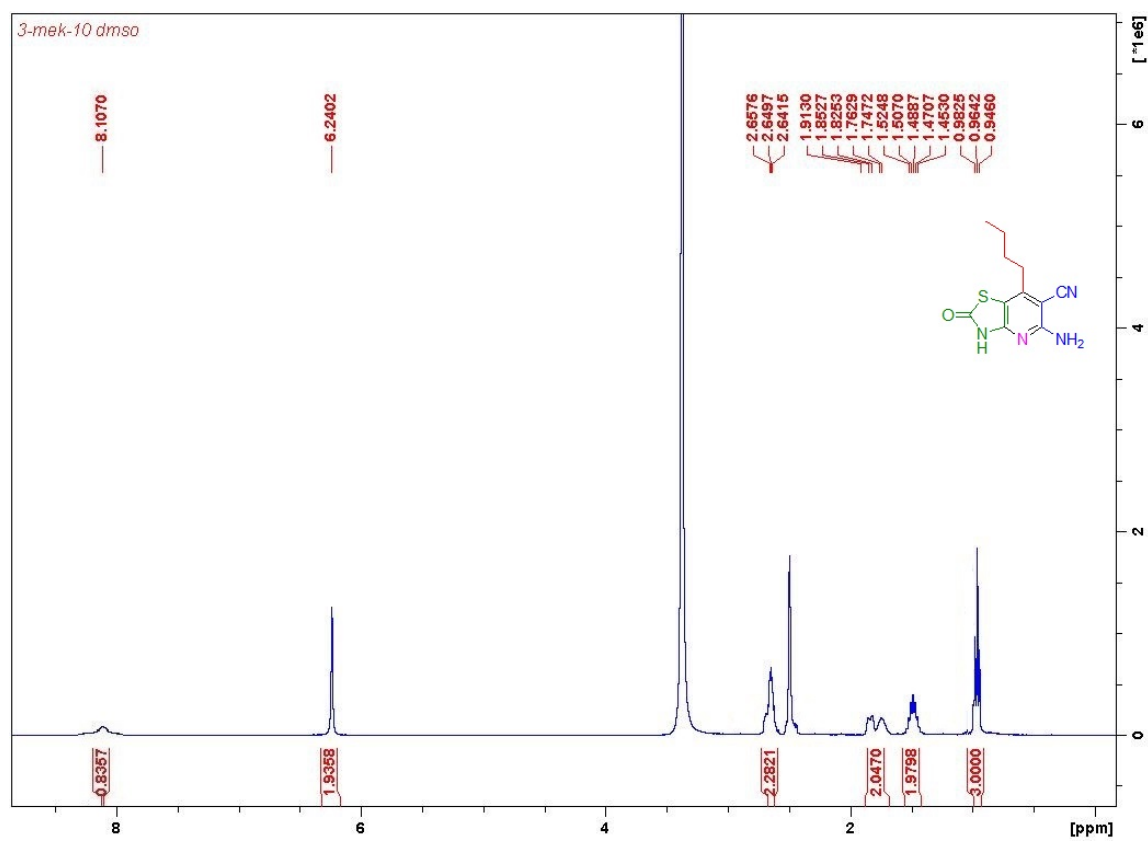

$^1\text{H}$  NMR spectra of compound **5i**
